# Supplementary material
Source: PubMed Central journal article supplement (PMC4042773)
Supplement: JCM.03636-13_zjm999093431so2.pdf [file JCM.03636-13_zjm999093431so2.pdf]

1 Table S1: Organisms used for the analytical specificity panel.

| Organism Name                                           | Result |        |
|---------------------------------------------------------|--------|--------|
|                                                         | HSV-LC | HSV-Qx |
| <i>Herpesviridae</i>                                    |        |        |
| HHV-1 (HSV-1)                                           | +      | +      |
| HHV-2 (HSV-2)                                           | +      | +      |
| HHV-3 (VZV, strain Ellen)                               | -      | -      |
| HHV-3 (VZV, strain OKA)                                 | -      | -      |
| HHV-3 (VZV, 20 clinical specimens from years 2003-2013) | -      | -      |
| HHV-4 (Epstein-Barr virus)                              | -      | -      |
| HHV-5 (cytomegalovirus)                                 | -      | -      |
| HHV-6a                                                  | -      | -      |
| HHV-6b                                                  | -      | -      |
| HHV-7                                                   | -      | -      |
| HHV-8                                                   | -      | -      |
| Other organisms*                                        | -      | -      |

2 \*Other organisms include: human adenovirus (subgroups A to F); influenza A (pandemic H1N1,  
3 H1N1 and H3N2); influenza B (Victoria and Yamagata lineages); parainfluenza virus (types 1 to  
4 4); respiratory syncytial virus (types A and B); human coronaviruses (229E, OC43, NL63, and  
5 HKU1); human metapneumovirus; rhinovirus (A, B or C); human bocavirus; enterovirus; mumps  
6 virus; *Streptococcus pneumoniae*, *Haemophilus influenzae*, *Moraxella catarrhalis*, *Legionella*  
7 *pneumophila*, *Mycoplasma pneumoniae*, *Staphylococcus aureus*, *Staphylococcus epidermidis*,  
8 *Pseudomonas aeruginosa*, *Escherichia coli*, *Neisseria gonorrhoeae*, and *Chlamydia trachomatis*.
