# Supplementary material
Source: PubMed Central journal article supplement (PMC4042773)

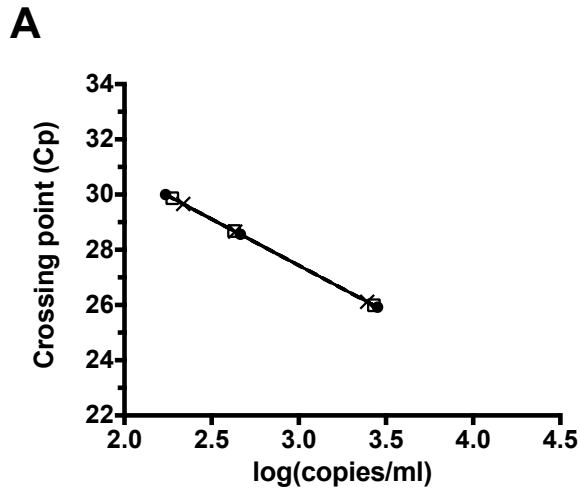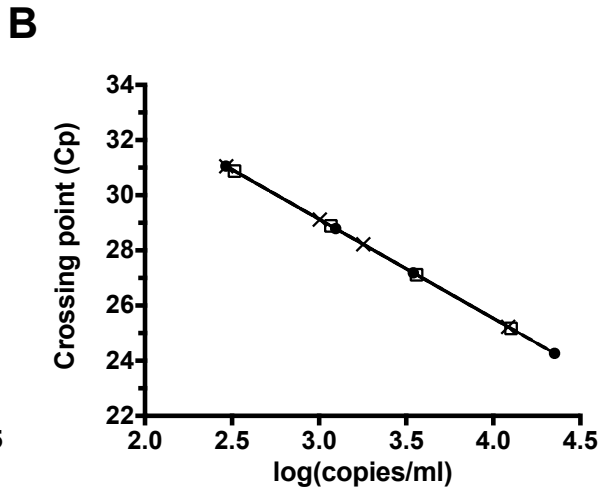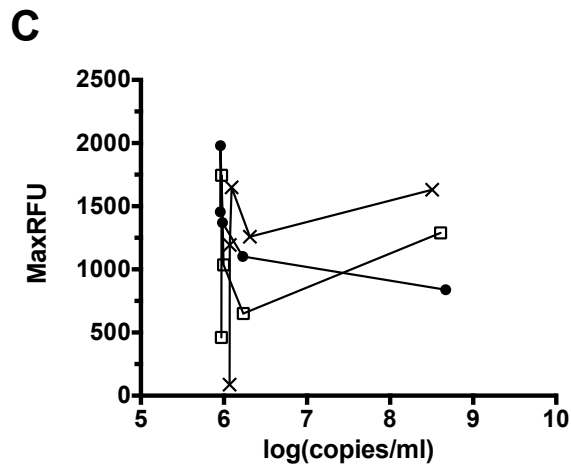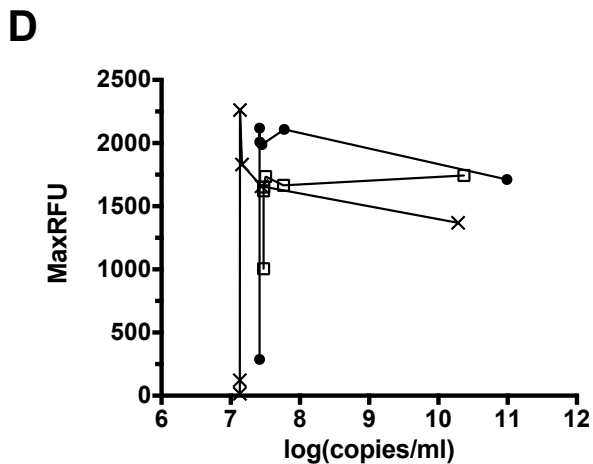

Supplement: JCM.03636-13_zjm999093431so1.pdf [file JCM.03636-13_zjm999093431so1.pdf]
